# Supplementary material for: The Epigenetics of Triple-Negative and Basal-Like Breast Cancer: Current Knowledge
Source: PubMed Central journal article supplement — J Breast Cancer. 2018 Sep 20;21(3):233–43. doi: 10.4048/jbc.2018.21.e41 (PMC6158152; doi:10.4048/jbc.2018.21.e41), 2018-09-20
Supplement: jbc-21-233-s001.pdf [file jbc-21-233-s001.pdf]

**Supplementary Table 1.** Current epigenetic modifications in TNBC and basal-like tumors

| No.                    | Findings                                                                                                                                                                                                                                                                                                                                                                                                                                                      | Samples                                                                                                                                                                                                                                            | Methods                                                                                                                                                                                    | Ref. |
|------------------------|---------------------------------------------------------------------------------------------------------------------------------------------------------------------------------------------------------------------------------------------------------------------------------------------------------------------------------------------------------------------------------------------------------------------------------------------------------------|----------------------------------------------------------------------------------------------------------------------------------------------------------------------------------------------------------------------------------------------------|--------------------------------------------------------------------------------------------------------------------------------------------------------------------------------------------|------|
| <b>DNA methylation</b> |                                                                                                                                                                                                                                                                                                                                                                                                                                                               |                                                                                                                                                                                                                                                    |                                                                                                                                                                                            |      |
| 1                      | <ul style="list-style-type: none"> <li>- 3 Methylation clusters, with the most hypomethylated associated with better prognosis and the medium methylated with worst prognosis</li> <li>- 17 Potential prognostic regions—lower methylation in low-risk groups</li> <li>- Hypermethylation of genes in axon guidance pathway</li> <li>- Methylation of gene bodies <i>WT1</i> and <i>WT1-AS</i> vs. promoter methylation</li> </ul>                            | 19 Formalin-fixed paraffin-embedded TNBC tissue and 6 matched normal samples                                                                                                                                                                       | - Whole genome methylation capture sequencing (MBD-Cap-Seq)                                                                                                                                | [23] |
| 2                      | <ul style="list-style-type: none"> <li>- Methylation of 5 genes (<i>CDKN2B</i>, <i>CD44</i>, <i>MGMT</i>, <i>RB</i>, and <i>p73</i>) and non-methylation of 11 genes (<i>GSTP1</i>, <i>PMS2</i>, <i>MSH2</i>, <i>MLH1</i>, <i>MSH3</i>, <i>MSH6</i>, <i>DLC1</i>, <i>CACNA1A</i>, <i>CACNA1G</i>, <i>TWIST1</i>, and <i>ID4</i>) are specific to TNBC</li> </ul>                                                                                              | - 61 Breast cancer tissue samples, including 28 TNBC                                                                                                                                                                                               | - Methylation profile of 110 CpG located within 69 cancer-involved genes (MS-MLPA)                                                                                                         | [27] |
| 3                      | <ul style="list-style-type: none"> <li>- 27%–37% of TNBC samples show <i>BRCA1</i> promoter methylation</li> </ul>                                                                                                                                                                                                                                                                                                                                            | 377 TNBC samples                                                                                                                                                                                                                                   | <ul style="list-style-type: none"> <li>- Array Comparative Genomic Hybridisation (aCGH)</li> <li>- <i>BRCA1</i> promoter methylation</li> </ul>                                            | [31] |
| 4                      | <ul style="list-style-type: none"> <li>- <i>BRCA1</i> and <i>ESR1</i> methylation in TNBC compared to non-TNBC</li> <li>- miR-4417, miR-590-5p higher expression in TNBC</li> </ul>                                                                                                                                                                                                                                                                           | 278 Formalin-fixed paraffin-embedded breast cancers containing 79 TNBC                                                                                                                                                                             | <ul style="list-style-type: none"> <li>- Promoter methylation (MS-MLPA) of 24 tumor suppressor genes</li> <li>- qRT-PCR for miR expression</li> </ul>                                      | [32] |
| 5                      | <ul style="list-style-type: none"> <li>- <i>EGR1</i> downregulation inversely correlated to methylation</li> <li>- 16 TNBC specific genes show altered DNA methylation, including <i>IGF1</i> and <i>IL6ST</i></li> <li>- Higher methylation of <i>SPRY2</i>, <i>EGR1</i>, <i>GREB1</i>, <i>ITIH5</i>, <i>LRRC17</i> and lower methylation of <i>AMIGO</i> are associated with better survival</li> </ul>                                                     | 23 Primary TNBC samples, 12 matched lymph node metastases, 11 matched normal adjacent tissues                                                                                                                                                      | - 450K DNA methylation BeadChip array analysis (Illumina)                                                                                                                                  | [37] |
| 6                      | <ul style="list-style-type: none"> <li>- <i>BRMS1</i> downregulated by DNA methylation in TNBC cell lines and breast cancer samples</li> <li>- Inverse correlation with lymph node metastasis</li> </ul>                                                                                                                                                                                                                                                      | <ul style="list-style-type: none"> <li>- TNBC cell lines MDA-MB-231, HCC-1937, MDA-MB-435 and normal breast tissue MCF-10A</li> <li>- 42 Paired normal and TNBC tissue samples</li> </ul>                                                          | <ul style="list-style-type: none"> <li>- RT-PCR</li> <li>- Methylation specific PCR</li> </ul>                                                                                             | [38] |
| 7                      | <ul style="list-style-type: none"> <li>- Cancer stem cells are regulated by hypomethylation of specific CpG sites of genes associated with stem cell properties <i>CD44</i>, <i>CD133</i>, and <i>Musashi-1 (MSI)</i>, promoter methylation being lower in TNBC</li> </ul>                                                                                                                                                                                    | <ul style="list-style-type: none"> <li>- 4 TNBC cell lines (MDA-MB-231, BT-549, BT-20, and HCC1937) and 5 non-TNBC cell lines (MCF-7, T47D, ZR-75-1, ZR-75-30, and SK-BR-3)</li> <li>- 91 Invasive ductal carcinomas, including 32 TNBC</li> </ul> | - Methylation analysis (MassARRAY EpiTYPER sequencing)                                                                                                                                     | [39] |
| 8                      | <ul style="list-style-type: none"> <li>- 5 Distinct DNA methylation groups</li> <li>- Group 5—most hypomethylated—associated with basal-like tumors</li> <li>- 80% TP53 mutations in basal-like tumors</li> <li>- Loss of <i>RB1</i>, <i>BRCA1</i> in basal-like tumors</li> </ul>                                                                                                                                                                            | - Primary breast tumor samples and germline DNA from 825 patients (802 samples for DNA methylation)                                                                                                                                                | <ul style="list-style-type: none"> <li>- DNA methylation</li> <li>- Exome sequencing</li> <li>- mRNA arrays</li> <li>- miRNA sequencing</li> <li>- Reverse-phase protein arrays</li> </ul> | [40] |
| 9                      | <ul style="list-style-type: none"> <li>- Specific methylation patterns corresponding to luminal A, B and basal-like subtypes, the most hypomethylated being basal-like and most hypermethylated luminal B</li> <li>- <i>BRCA2</i> carriers tumors more methylated than <i>BRCA1</i></li> <li>- <i>RASSF1</i>, <i>GSTP1</i> unmethylated in basal-like tumors</li> <li>- <i>ARHGDI1</i>, <i>GRB7</i>, <i>SEMA3B</i> methylated in basal-like tumors</li> </ul> | - 189 Fresh frozen primary breast tumors and 4 normal breast tissue samples                                                                                                                                                                        | Array based methylation assay for 1505 CpG loci corresponding to 807 cancer related genes                                                                                                  | [41] |

(Continued to the next page)

Supplementary Table 1. Continued

| No.                   | Findings                                                                                                                                                                                                                            | Samples                                                                                                                                                                                                                                                   | Methods                                                                                                                                                                                 | Ref. |
|-----------------------|-------------------------------------------------------------------------------------------------------------------------------------------------------------------------------------------------------------------------------------|-----------------------------------------------------------------------------------------------------------------------------------------------------------------------------------------------------------------------------------------------------------|-----------------------------------------------------------------------------------------------------------------------------------------------------------------------------------------|------|
| 10                    | - Methylation of 6 genes ( <i>CDH1</i> , <i>CEACAM6</i> , <i>CST6</i> , <i>ESR1</i> , <i>LCN2</i> , and <i>SCNN1A</i> ) in basal-like cell lines<br>- Aberrant DNMT3b expression<br>- Elevated total DNA methyltransferase activity | 12 Breast cancer cell lines (BT20, BT549, Hs578T, MCF7, MDA-MB-231, MDA-MB-415, MDA-MB-435S, MDA-MB-436, MDA-MB-453, MDA-MB-468, SKBR3, and ZR-75-1) and normal breast epithelial cell line MCF12A                                                        | - Gene expression (RT-PCR), promoter methylation of 64 genes<br>- DNA methyltransferase machinery assessment (total DNMT activity and expression of DNMT1, DNMT3a, and DNMT3b proteins) | [44] |
| 11                    | - Enhanced effect of doxorubicin, paclitaxel and 5-fluorouracil after DNMT3b inhibition<br>- Re-expression of methylated genes, including <i>ESR1</i>                                                                               | MDA-MB-453, BT549, Hs578T cell lines                                                                                                                                                                                                                      | - Treatment with 5-aza<br>- RNAi-mediated DNMT3b mediated knockdown and treatment with doxorubicin, paclitaxel and 5-fluorouracil                                                       | [45] |
| <b>Noncoding RNAs</b> |                                                                                                                                                                                                                                     |                                                                                                                                                                                                                                                           |                                                                                                                                                                                         |      |
| 12                    | - TNBC classification by mRNA and lncRNA profiling<br>- 4 clusters: immunomodulatory (IM), luminal androgen receptor (LAR), mesenchymal-like (MES) and basal-like and immune suppressed (BLIS)                                      | 165 TNBC samples                                                                                                                                                                                                                                          | - Transcriptome profiling (human transcriptome microarrays)                                                                                                                             | [46] |
| 13                    | - lncRNAs with differential expression were found in TNBC, with no functional correlations so far                                                                                                                                   | 3 Pairs of TNBC and adjacent non-tumor tissues plus 12 paired samples for validation                                                                                                                                                                      | - lncRNA expression microarray<br>- qRT-PCR validation                                                                                                                                  | [47] |
| 14                    | - lncRNAs with differential expression were found in TNBC<br>- Possible association between ER, <i>ANKRD30A</i> and lncRNA <i>LINC0099</i>                                                                                          | 3 Pairs of TNBC and adjacent non-tumor tissues plus 48 paired samples for validation                                                                                                                                                                      | - lncRNA expression microarray<br>- qRT-PCR validation<br>- Bioinformatics analysis for lncRNA functions (gene ontology)                                                                | [48] |
| 15                    | - lncRNA <i>MALAT1</i> promotes metastasis of TNBC and may be useful as a prognostic marker in lymph-node negative patients                                                                                                         | - TCGA microarray data set (493 breast cancer samples)<br>- Normal breast cell line MCF10A and breast cancer cell lines -TNBC subtype: MDA-MB-231, Hs578T, HCC1806; HER2+ subtype: SKBR3; luminal subtype: MCF7, T-47D for interrogating functional roles | - <i>MALAT1</i> expression (qRT-PCR)                                                                                                                                                    | [49] |
| 16                    | - <i>HOTAIRM1</i> is upregulated in basal-like tumors                                                                                                                                                                               | 658 Infiltrating breast ductal carcinomas, including 126 basal-like samples (from the TCGA breast cancer RNA-Seq data)                                                                                                                                    | - Bioinformatic analysis                                                                                                                                                                | [50] |
| 17                    | - lncRNA <i>FOXCUT</i> is overexpressed in basal-like tumors                                                                                                                                                                        | - 55 Primary breast cancer samples, including 25 basal-like<br>- MDA-MB-231 and MDA-MB-468 cell lines                                                                                                                                                     | - Expression profile (RT-qPCR and siRNA transfection)                                                                                                                                   | [51] |
| 18                    | - lncRNA <i>HOTAIR</i> is up-regulated in MCF-7-TNR cells (basal-like derivative of the luminal-like MCF-7), BT-549 and MDA-MB-157 and plays a role in maintaining the basal-like phenotype                                         | MCF-7-TNR, MC-7, BT-549 and MDA-MB-157 cell lines                                                                                                                                                                                                         | - <i>HOTAIR</i> expression and siRNA inhibition                                                                                                                                         | [53] |
| 19                    | - lncRNA <i>HOTAIR</i> expression is repressed by combined treatment of lapatinib plus imatinib through $\beta$ -catenin downregulation                                                                                             | - MCF-7, T47D, BT474, MDA-MB-468, MDA-MB-231, ZR-75-1, SK-BR3, SUM159 and HCC1806 cell lines<br>- 21 Formalin-fixed paraffin-embedded primary breast tumor tissue, including 11 TNBC                                                                      | - Lapatinib+imatinib treatment of TNBC cell lines (MDA-MB-231, MDA-MB-468, HCC1806, and SUM159)<br>- <i>HOTAIR</i> expression                                                           | [54] |

(Continued to the next page)

Supplementary Table 1. Continued

| No.                          | Findings                                                                                                                                                                                                                                                                                             | Samples                                                                                                                                                                                                                                                                      | Methods                                                                                                                           | Ref. |
|------------------------------|------------------------------------------------------------------------------------------------------------------------------------------------------------------------------------------------------------------------------------------------------------------------------------------------------|------------------------------------------------------------------------------------------------------------------------------------------------------------------------------------------------------------------------------------------------------------------------------|-----------------------------------------------------------------------------------------------------------------------------------|------|
| 20                           | - Upregulation of miR-493 and miR-155 correlate with better outcome<br>- Downregulation of miR-30e and miR27a correlate with poor outcome                                                                                                                                                            | 173 Paraffin-embedded TNBC samples                                                                                                                                                                                                                                           | - miRNA expression profiling                                                                                                      | [55] |
| 21                           | - miR-10b and miR-26a can downregulate <i>BRCA1</i> expression in MDA-MB-231 (TN) and MCF7 (luminal) cell lines                                                                                                                                                                                      | 9 Sporadic human breast cancer cell lines of which 7 TNBC and 1 normal breast tissue sample                                                                                                                                                                                  | - miRNA expression profiling                                                                                                      | [56] |
| 22                           | - <i>BRCA1</i> expression positively correlates with miR-146a and leads to downregulation of <i>EGFR</i>                                                                                                                                                                                             | Breast cancer cell lines including 3 TNBC, SKOV3 ovarian cancer cell line and HMLE, MCF10A mammary epithelial cell lines                                                                                                                                                     | - miRNA profiling<br>- miR knockdown<br>- Protein expression studies<br>- Mammosphere formation assay                             | [57] |
| 23                           | - miR-146a and miR-146b-5p downregulate <i>BRCA1</i> in TNBC                                                                                                                                                                                                                                         | - 3 Normal mammary cell lines and 15 breast cancer cell lines, including 3 TNBC<br>- 76 Primary breast tumor tissues<br>- 167 Breast tumor tissues                                                                                                                           | - miRNA target prediction algorithms<br>- miR-146a/b-5p expression and inhibition studies                                         | [58] |
| 24                           | - miR-4417, miR-590-5p higher expression in TNBC                                                                                                                                                                                                                                                     | 278 Formalin-fixed paraffin-embedded breast cancers containing 79 TNBC                                                                                                                                                                                                       | - qRT-PCR for miR expression                                                                                                      | [32] |
| 25                           | - miR-200c downregulation correlates with locus methylation and is associated with lymph node metastasis in TNBC<br>- Low levels of miR-200c are associated with high levels of ZEB1 transcription factor which promotes EMT<br>- miR-200c/ZEB1 axis as target for metastatic TNBC                   | - 51 TNBC samples<br>- TCGA data set<br>- MDA-MB-231 and MDA-MB-157 cell lines for functional analysis                                                                                                                                                                       | - qRT-PCR and methylation analysis                                                                                                | [59] |
| 26                           | - miR-200b suppresses TNBC migration and metastasis by inhibiting protein kinase Ca                                                                                                                                                                                                                  | - MCF-7, T-47D, BT-474, MDA-MB-453, SKBR-3, MDA-MB-468, BT-20, Hs578T and BT-549 cell lines<br>- Mouse mammary xenograft tumor model                                                                                                                                         | - miR-200b expression and knockdown studies<br>- <i>In vitro</i> and <i>in vivo</i> migration and metastasis studies respectively | [60] |
| 27                           | - miR-200a modulates TNBC migration through regulating the <i>EPHA2</i> oncogene                                                                                                                                                                                                                     | - Breast cancer dataset for mRNA levels of <i>EPHA2</i> and corresponding patient survival<br>- HC11, MDA-MB-231, SUM159 cell lines                                                                                                                                          | - miR200a transfection study<br>- miRNA expression analysis<br>- Proliferation and migration assays                               | [61] |
| 28                           | - Overexpression of miR-200b-3p and miR-429-5p inhibits the proliferation, migration, and invasion of TNBC cell lines                                                                                                                                                                                | MDA-MB-231 and HCC1937 TNBC cells                                                                                                                                                                                                                                            | - miR transfection<br>- Proliferation, migration and invasion assays                                                              | [62] |
| <b>Histone modifications</b> |                                                                                                                                                                                                                                                                                                      |                                                                                                                                                                                                                                                                              |                                                                                                                                   |      |
| 29                           | - Distinct H3K36me3 patterns in the TNBC cell lines<br>- AR pathway genes active especially in claudin-low TNBC cell lines, while AR pathway regulators had lower expression levels in basal-like<br>- AFAP1-AS1 found as TNBC specific gene marked by the active H3K4me3 and H3K79me2 modifications | - 2 Normal immortalized cell lines, 76NF2V and MCF10A<br>- 2 Luminal A lines, MCF7, ZR751<br>- 2 Luminal B lines, MB361, UACC812<br>- 2 HER2 lines SKBR3, AU565, HCC1954<br>- 2 Basal TNBC cell lines, MB468 and HCC1937<br>- 2 Claudin low TNBC cell lines, MB231 and MB436 | - ChIP-Seq, GRO-Seq and RNA-Seq analysis<br>- siRNA mediated depletion of AFAP1-AS1 in MDA-MB-231 and HCC1937                     | [64] |

(Continued to the next page)

Supplementary Table 1. Continued

| No. | Findings                                                                                                                                                                                                                                                                             | Samples                                                                                                                                                                                                                                          | Methods                                                                                                                                                                                       | Ref. |
|-----|--------------------------------------------------------------------------------------------------------------------------------------------------------------------------------------------------------------------------------------------------------------------------------------|--------------------------------------------------------------------------------------------------------------------------------------------------------------------------------------------------------------------------------------------------|-----------------------------------------------------------------------------------------------------------------------------------------------------------------------------------------------|------|
| 30  | - BCL11A interacts with histone methyltransferase (PRC2) and histone deacetylase (NuRD and SIN3A) complexes and contributes to maintenance of a chemoresistant breast cancer stem cell population in TNBC including basal-like                                                       | - Microarray data sets<br>- Immortalized non-tumorigenic mouse Eph4 and human HMLE cell lines<br>- TNBC cell lines 4T1 (mouse), MDA231, SUM159 and HMLER (human)<br>- Immune compromised mice<br>- BCL11A conditional knockout and knock-in mice | - BCL11A overexpression studies and mammosphere assay<br>- shRNA knockdown of BCL11A<br>- Modified cells' injection to assess tumor formation<br>- TNBC-like tumor promotion by DMBA staining | [65] |
| 31  | - <i>KAT5</i> (histone acetylase inhibitor), <i>DOT1L</i> (H3K79 methylator) and <i>G9a</i> (histone methyltransferase) downregulation induce E-CAD expression to promote an epithelial phenotype                                                                                    | - MDA-MB-231 cell line                                                                                                                                                                                                                           | - siRNA library screening for EMT regulators (729 chromatin modifying targets)                                                                                                                | [74] |
| 32  | - Overexpression of macroH2A1.1 correlates with claudin-low subtype and TNBC poor outcome                                                                                                                                                                                            | - GEO, EMBL-EBI and publisher databases<br>- MCF-7, MDA-MB231, ZR-75, MDA-MB436 and Hs578T cell lines                                                                                                                                            | - Biostatistical correlation studies on intrinsic molecular subclasses of breast cancer and molecular characteristics of EMT<br>- Protein quantification, qRT-PCR                             | [75] |
| 33  | - 3 Groups of histone modification patterns<br>- Hypomodified cluster, characterized by moderate to low levels of lysine acetylation (H3K9ac, H3K18ac, and H4K12ac), lysine (H3K4me2 and H4K20me3), and arginine methylation (H4R3me2) associated with basal-like and HER2+ subtypes | - 880 Invasive breast carcinomas                                                                                                                                                                                                                 | - Tissue microarray, immunohistochemistry<br>- Immunofluorescence and western blotting for validation                                                                                         | [21] |
| 34  | - Differential H3K4me2 & H3K27me3 methylation between CSC and non-CSC suggest Wnt & GnRH signaling pathways are responsible for aggressiveness in TNBC                                                                                                                               | - MDA-MB-231 cell line<br>- BALB/c nude+ mice                                                                                                                                                                                                    | - Invasion and xenotransplantation assays<br>- RN-seq, WGBS and CHIP-seq analysis                                                                                                             | [77] |
| 35  | - HDACi suberoylanilide hydroxamic acid (vorinostat) and sodium butyrate inhibit cell proliferation, induce apoptosis and downregulate transcription of mutant p53 in TNBC cell lines                                                                                                | - TNBC cell lines MDA-MB-231 and BT-549                                                                                                                                                                                                          | - Transfection studies<br>- Cell cycle and apoptosis assays                                                                                                                                   | [79] |
| 36  | - HDACi panabinostat induces hyperacetylation of histones H3 and H4, decreases proliferation and survival, and induces apoptosis in TNBC cell lines and decreases tumor size <i>in vivo</i>                                                                                          | - TNBC cell lines MDA-MB-157, MDA-MB-231, MDA-MB-468, BT-549<br>- Orthotopic MDA-MB-231 and BT-549 mouse xenograft models                                                                                                                        | - Histone acetylation assays<br>- Proliferation assay and cell cycle analysis<br>- Protein expression studies                                                                                 | [83] |
| 37  | - HDACi vorinostat enhances the growth inhibitory ability of PARP inhibitor olaparib in TNBC cells with overexpression of PTEN and <i>in vivo</i> in an MDA-MB-231 mouse model                                                                                                       | - Human breast cancer cells (MDA-MB-157, -231, -453, -468, BT-549, MCF7, T47D, SK-BR-3, HCC70, HCC1143, and Hs578T)<br>- Breast cancer xenograft mouse model                                                                                     | - Cytotoxic assay and cell cycle analysis<br>- <i>PTEN</i> transfection<br>- Proliferation, apoptosis and autophagy analysis                                                                  | [84] |
| 38  | - Combination of vorinostat and immune checkpoint inhibitors (PD-1 and CTLA-4 blockade) on mice models of TNBC lead to decreased tumor growth and prolonged survival                                                                                                                 | - Human breast cancer cell lines, including 1 TNBC<br>- Mouse breast cancer cells<br>- <i>In vivo</i> model of mouse breast cancer cell line similar to TNBC                                                                                     | - PD-L1 expression analysis<br>- Co-culture with peripheral blood mononuclear cells<br>- <i>In vivo</i> therapy of mouse model with vorinostat, anti-PD-1 blockade or both drugs              | [86] |
| 39  | - HDACi entinostat decreases the ability of TNBC to form lung metastasis in an <i>in vivo</i> mouse model and reduces tumor formation from patient derived xenografts                                                                                                                | - Breast cancer cell lines including 1 TNBC<br>- MDA-MB-231 mouse xenograft<br>- Patient derived xenograft                                                                                                                                       | - Protein and miRNA expression analysis<br>- Mammosphere formation assay<br>- Tumor formation and metastasis development <i>in vivo</i>                                                       | [87] |

(Continued to the next page)

Supplementary Table 1. Continued

| No. | Findings                                                                        | Samples                                                                        | Methods                                                                                                                                                                        | Ref. |
|-----|---------------------------------------------------------------------------------|--------------------------------------------------------------------------------|--------------------------------------------------------------------------------------------------------------------------------------------------------------------------------|------|
| 40  | - Vorinostat has the ability to prevent brain metastasis of TNBC <i>in vivo</i> | - Mouse model of 231-BR brain trophic subline of the MDA-MB-231 TNBC cell line | - Pharmacokinetic and pharmacodynamic studies of vorinostat uptake in the brain<br>- Histone acetylation, cell cycle and apoptosis analysis <i>in vitro</i> and <i>in vivo</i> | [88] |
| 41  | - Histone methyltransferase hSETD1A positivity correlated with worse outcome    | - 159 TNBC samples                                                             | - Protein expression studies—immunohistochemistry, qRT-PCR                                                                                                                     | [90] |

TNBC=triple-negative breast cancer; RT-PCR=reverse transcription polymerase chain reaction; qRT-PCR=quantitative RT-PCR; mRNA=messenger RNA; miRNA=microRNA; RNAi=RNA interference; lncRNA=long noncoding RNA; ER=estrogen receptor; TCGA=The Cancer Genome Atlas; siRNA=small interfering RNA; EMT=epithelial-to-mesenchymal transition; AR=androgen receptor; HER2=human epidermal growth factor receptor 2; shRNA=small hairpin RNA; DMBA=7,12-dimethylbenz(a)anthracene – a potent carcinogen; CSC=cancer stem cells; HDACi=histone deacetylase inhibitors; PARP=poly (ADP-ribose) polymerase.
